# Supplementary material
Source: PubMed Central journal article supplement (PMC6109967)

## **Supplemental material:**

### **Table 1: FACS antibodies**

Receptors and intracellular proteins were grouped in 5 panels as shown. Activation and functional panels were performed with and without stimulation as described in Materials and Methods. All panels included CD56, CD3 and CD45 to identify NK cells as CD45<sup>+</sup>CD56<sup>+</sup>CD3<sup>-</sup>.

**Supplemental Table 2.** Heterozygous and homozygous variants detected by whole exome sequencing of the proband and his affected siblings that are present at low frequency in the ExAC database.

**Supplemental Figure 1. Genetic confirmation of PI3K110δ mutation.** A) Pedigree of our proband showing affected (filled) and unaffected (open) family members accompanied by the Sanger confirmation of the E525K (Chr1:9780851\_G>A:NM\_005026:exon13:c.1573G>A) mutation. B) Schematic of PI3K110δ protein showing the positions of E525K and E1021K mutations. ABD: adaptor binding domain; RBD: Ras-binding domain.

**Supplemental Figure 2. Intracellular cytokine staining.** PBMC from 5 healthy donors (black circles) and PI3K110δ patients with E525K (red) or E1021K (blue) mutations were analyzed by flow cytometry following 4 hours of stimulation with phorbol myristate acetate and ionomycin in the presence of Brefeldin A. A) Intracellular cytokine expression in CD56<sup>bright</sup> NK cells. \**p*<0.05 by Student's two-tailed T test.

|                               | <b>Fluorophore</b>       | <b>Marker</b> | <b>Clone; Source</b>         |
|-------------------------------|--------------------------|---------------|------------------------------|
| <b>Anchor</b><br>(all panels) | <b>QD605</b>             | <b>CD56</b>   | <b>HCD56, Biolegend</b>      |
|                               | <b>QD711</b>             | <b>CD3</b>    | <b>SK7, Biolegend</b>        |
|                               | <b>PE Cy7 or APC Cy7</b> | <b>CD45</b>   | <b>J.33, Beckman Coulter</b> |
| Maturation                    | APC                      | CD94          | DX22, Biolegend              |
|                               | APC Cy7                  | CD34          | 581, Biolegend               |
|                               | Pacific Blue             | CD57          | NC1, Beckman Coulter         |
|                               | QD655                    | CD62L         | DREG56, Biolegend            |
|                               | PE Cy7                   | CD117         | 104D2, Biolegend             |
|                               | CF 594                   | CD16          | 3G8, Biolegend               |
|                               | FITC                     | IL15Ra        | 151303, R&D Systems          |
|                               | PE                       | CD122         | TU27, Biolegend              |
| Adhesion                      | PE Cy5                   | CD27          | O323, Affymetrix eBioscience |
|                               | Pacific Blue             | CD2           | 39C1.5, Beckman Coulter      |
|                               | PE                       | CD28          | L293, BD Biosciences         |
|                               | PE Cy7                   | CD11a         | HI111, BD Biosciences        |
|                               | CF 594                   | CD11b         | ICRF44, BD Biosciences       |
|                               | APC                      | CD18          | 6.7, BD Pharmingen           |
| Inhibitory                    | APC Cy7                  | KLRG1         | REA261, Miltenyi Biotec      |
|                               | Bv421                    | CD158e        | DX9, Biolegend               |
|                               | PE Cy7                   | CD158a        | HP-MA4, eBioscience          |
|                               | FITC                     | CD158b        | DX27, Biolegend              |
|                               | AlexaFluor 700           | NKG2A         | 131411, R&D Systems          |
|                               | PE                       | NKG2C         | 134591, R&D Systems          |
|                               | PE-Cy7                   | NKG2D         | 1D11, Biolegend              |
| Function                      | AlexaFluor 700           | IFN $\gamma$  | 4S.B3, Biolegend             |
|                               | FITC                     | Perforin      | $\delta$ G9, BD Pharmingen   |
|                               | Pacific Blue             | GM-CSF        | BVD2-21C11, Biolegend        |
|                               | PE Cy7                   | IL-10         | JES3-9D7, Biolegend          |
|                               | CF 594                   | Granzyme B    | GB11, Invitrogen             |
|                               | APC                      | IL-13         | JES10-5A2                    |
|                               | QD655                    | TNF $\alpha$  | Mab11, Biolegend             |
| Activating                    | Pacific Blue             | NKp46         | 9E2, Biolegend               |
|                               | Bv785                    | CD8a          | RPA-T8, Biolegend            |
|                               | CF 594                   | CD69          | FN50, BD Biosciences         |
|                               | APC                      | NKp30         | P30-15, Biolegend            |
|                               | AlexaFluor 700           | CD25          | B1.49.9, Beckman Coulter     |
|                               | FITC                     | CD244         | 2-69, BD Biosciences         |

| <b>Patient 1: homozygous</b>    |                     |     |     |      |                  |
|---------------------------------|---------------------|-----|-----|------|------------------|
| Gene                            | Coordinates         | vR  | tR  | Type | Frequency (EXaC) |
| APEX2                           | X:55032975_C>T      | 265 | 266 | NS   | 0.0006           |
| C6ORF120                        | 6:170102970_G>A     | 5   | 6   | NS   | 0.0006           |
| CFHR1                           | 1:196799651_C>T     | 587 | 587 | NS   | 1.75E-05         |
| CFHR3                           | 1:196744044_A>G     | 280 | 280 | NS   | 1.75E-05         |
| DEFB106B                        | 8:7686465_T>C       | 22  | 27  | NS   | 0.0003           |
| DMD                             | X:32398793_G>A      | 12  | 12  | NS   |                  |
| FAM83E                          | 19:49116502_G>A     | 17  | 20  | NS   | 0.0012           |
| FAM123B                         | X:63412689_G>A      | 51  | 51  | NS   | 0.0002           |
| GPR119                          | X:129519219_C>T     | 400 | 400 | NS   | 3.42E-05         |
| KIR2DL1                         | 19:55286731_G>C     | 5   | 6   | NS   | 9.27E-06         |
| MTMR8                           | X:63563592_A>T      | 34  | 34  | NS   | 0.0006           |
| PCDHA8                          | 5:140222138_G>C     | 15  | 16  | NS   | 0.0002           |
| PCDHA8                          | 5:140222140_G>A     | 8   | 9   | NS   | 5.94E-05         |
| SPANXC                          | X:153200861_C>T     | 13  | 13  | SP   | 0.0078           |
| RIN3                            | 14:93118230_G>A     | 18  | 22  | NS   | 0.0014           |
| SHROOM2                         | X:9863139_G>T       | 58  | 59  | NS   |                  |
| SHROOM4                         | X:50377101_T>C      | 111 | 111 | NS   | 0.0013           |
| SPANXC                          | X:140335820_T>G     | 47  | 47  | NS   | 0.0072           |
| STARD8                          | X:67943959_C>T      | 83  | 83  | NS   | 0.0018           |
| TAF1                            | X:70614091_A>G      | 213 | 213 | S    | 0.0007           |
| ZNF91                           | 19:23544656_C>A     | 126 | 148 | NS   | 0.002            |
| <b>Patient 1 : Heterozygous</b> |                     |     |     |      |                  |
| CLPX                            | 15:65477449_G>A     | 62  | 112 | NS   | 0                |
| KIAA0182                        | 16:85691198_A>G     | 10  | 33  | NS   | 0                |
| CSMD2                           | 1:34049296_T>C      | 160 | 315 | NS   | 8.24E-06         |
| PFDN2                           | 1:161070592_T>C     | 70  | 150 | NS   | 8.24E-06         |
| MKL2                            | 16:14354915_G>A     | 113 | 223 | NS   | 8.24E-06         |
| PRG2                            | 11:57156551_C>G     | 142 | 263 | NS   | 8.24E-06         |
| OSBP                            | 11:59368096_T>A     | 66  | 125 | NS   | 8.24E-06         |
| PPP2R1B                         | 11:111624231_ATAG>A | 36  | 83  | NS   | 8.25E-06         |
| PSG6                            | 19:43414917_T>C     | 125 | 274 | NS   | 8.25E-06         |
| MFSD9                           | 2:103340182_A>G     | 53  | 101 | NS   | 8.25E-06         |
| CD59                            | 11:33743924_C>T     | 250 | 504 | SP   | 8.26E-06         |
| SMC2                            | 9:106892056_A>G     | 50  | 106 | NS   | 8.26E-06         |
| PLCXD2                          | 3:111394102_G>T     | 123 | 241 | NS   | 8.26E-06         |
| CUL7                            | 6:43019122_C>T      | 80  | 170 | NS   | 8.26E-06         |

|          |                  |     |     |    |          |
|----------|------------------|-----|-----|----|----------|
| LRRN1    | 3:3887010_G>A    | 14  | 30  | NS | 8.27E-06 |
| CDH3     | 16:68716386_G>A  | 234 | 472 | NS | 8.27E-06 |
| SEMA4C   | 2:97533568_A>G   | 113 | 242 | NS | 8.27E-06 |
| ZNF860   | 3:32030804_C>G   | 128 | 291 | NS | 8.28E-06 |
| MTHFD2   | 2:74434861_C>A   | 55  | 106 | NS | 8.29E-06 |
| GRHPR    | 9:37428554_G>A   | 41  | 71  | NS | 8.31E-06 |
| MLKL     | 16:74719433_G>T  | 57  | 127 | NS | 8.35E-06 |
| TMEM184B | 22:38643835_C>A  | 77  | 160 | NS | 8.71E-06 |
| SCYL1    | 11:65303419_C>T  | 108 | 217 | SP | 8.98E-06 |
| ZNF786   | 7:148768980_G>C  | 3   | 6   | NS | 9.08E-06 |
| DEDD2    | 19:42713982_TG>T | 4   | 50  | SL | 9.66E-06 |
| OSR2     | 8:99963921_G>A   | 41  | 88  | NS | 1.04E-05 |
| AGRN     | 1:983186_G>A     | 10  | 14  | NS | 1.31E-05 |
| GRIK3    | 1:37285433_C>T   | 163 | 324 | NS | 1.61E-05 |
| GTF2E2   | 8:30510979_C>G   | 40  | 85  | NS | 1.65E-05 |
| CPS1     | 2:211512716_A>G  | 392 | 770 | NS | 1.65E-05 |
| ZFYVE26  | 14:68250051_G>A  | 222 | 461 | NS | 1.65E-05 |
| FAM13C   | 10:61022330_G>T  | 57  | 106 | NS | 1.65E-05 |
| KIF14    | 1:200572990_G>T  | 36  | 115 | NS | 1.65E-05 |
| PUS7L    | 12:44148765_G>C  | 66  | 121 | NS | 1.65E-05 |
| SULF1    | 8:70536224_G>A   | 102 | 214 | NS | 1.65E-05 |
| ABCA12   | 2:215819927_G>A  | 122 | 243 | NS | 1.65E-05 |
| ANKMY1   | 2:241420464_C>T  | 100 | 213 | NS | 1.65E-05 |
| MAP1LC3A | 20:33137836_C>G  | 78  | 123 | SP | 1.65E-05 |
| SHANK2   | 11:70331487_C>G  | 104 | 172 | NS | 1.65E-05 |
| ZNF407   | 18:72343804_C>T  | 123 | 238 | NS | 1.66E-05 |
| CCL20    | 2:228680208_C>T  | 20  | 44  | NS | 1.66E-05 |
| ADAM29   | 4:175898929_T>A  | 58  | 282 | NS | 1.66E-05 |
| ABI3BP   | 3:100585752_A>G  | 49  | 89  | NS | 1.66E-05 |
| IRAK4    | 12:44167807_G>A  | 25  | 65  | NS | 1.67E-05 |
| OR10H4   | 19:16060734_A>G  | 20  | 37  | NS | 1.68E-05 |
| ZDHHC24  | 11:66311391_C>T  | 76  | 129 | NS | 1.69E-05 |
| FAM83C   | 20:33875024_C>A  | 26  | 52  | NS | 1.72E-05 |
| H2AFV    | 7:44874160_A>G   | 5   | 42  | NS | 1.72E-05 |
| TGFB1I1  | 16:31485899_C>T  | 77  | 164 | NS | 1.73E-05 |
| OR1L6    | 9:125512745_G>A  | 46  | 94  | NS | 1.73E-05 |

| <b>Patient 2: homozygous</b>    |                     |     |     |      |                  |
|---------------------------------|---------------------|-----|-----|------|------------------|
| Gene                            | Coordinates         | vR  | tR  | Type | Frequency (EXaC) |
| AHNAK2                          | 14:105416756_C>T    | 45  | 50  | NS   | 4.20E-05         |
| ANKRD36B                        | 2:98148841_T>G      | 134 | 135 | NS   | 0.0063           |
| DUSP1                           | 5:172197687_C>T     | 5   | 6   | NS   |                  |
| FAM157B                         | 9:141124247_A>G     | 5   | 6   | NS   | 0.0009           |
| GNL1                            | 6:30520367_C>T      | 87  | 87  | NS   | 0.0074           |
| GPR119                          | X:129519219_C>T     | 66  | 67  | NS   | 3.42E-05         |
| KAL1                            | X:8504901_G>T       | 107 | 109 | NS   | 0.0018           |
| KRTDAP                          | 19:35979745_G>T     | 30  | 30  | SP   | 0.0003           |
| MAGEC1                          | X:140994018_C>G     | 14  | 15  | NS   | 7.94E-05         |
| MUC1                            | 1:155161505_G>C     | 5   | 6   | NS   |                  |
| MUC4                            | 3:195506369_C>A     | 77  | 88  | NS   | 6.06E-05         |
| MUC4                            | 3:195506630_T>C     | 51  | 54  | NS   | 5.91E-05         |
| PITRM1                          | 10:3182940_C>T      | 35  | 35  | NS   | 0.0001           |
| RENBP                           | X:153200861_C>T     | 33  | 33  | SP   | 0.0078           |
| SPANXC                          | X:140335820_T>G     | 30  | 32  | NS   | 0.0072           |
| STK19                           | 6:31948509_C>T      | 14  | 14  | NS   | 0.0005           |
| TG                              | 8:133906136_G>A     | 111 | 111 | NS   | 0.0062           |
| <b>Patient 2 : Heterozygous</b> |                     |     |     |      |                  |
| ATOH8                           | 2:85981731_C>G      | 5   | 11  | NS   | 0                |
| CEP170B                         | 14:105350603_G>A    | 22  | 51  | NS   | 0                |
| CLPX                            | 15:65477449_G>A     | 70  | 145 | NS   | 0                |
| FAM20A                          | 17:66596762_CCAG>C  | 3   | 48  | NFS  | 0                |
| GSE1                            | 16:85691198_A>G     | 16  | 42  | NS   | 0                |
| PCSK4                           | 19:1481916_G>A      | 25  | 51  | NS   | 0                |
| RGPD5                           | 2:113147238_A>G     | 3   | 7   | NS   | 0                |
| CSMD2                           | 1:34049296_T>C      | 42  | 99  | NS   | 8.24E-06         |
| PFDN2                           | 1:161070592_T>C     | 100 | 214 | NS   | 8.24E-06         |
| PRG2                            | 11:57156551_C>G     | 37  | 87  | NS   | 8.24E-06         |
| SREBF2                          | 22:42280858_C>G     | 55  | 114 | NS   | 8.24E-06         |
| OSBP                            | 11:59368096_T>C     | 138 | 242 | NS   | 8.24E-06         |
| PPP2R1B                         | 11:111624231_ATAG>A | 24  | 49  | NS   | 8.25E-06         |
| LAMP3                           | 3:182872138_G>A     | 112 | 224 | NS   | 8.25E-06         |
| CD59                            | 11:33743924_C>T     | 27  | 66  | SP   | 8.26E-06         |
| SMC2                            | 9:106892056_A>G     | 55  | 103 | NS   | 8.26E-06         |
| PCDHGA4                         | 5:140736922_TG>T    | 32  | 63  | FS   | 8.26E-06         |

|          |                  |     |     |    |          |
|----------|------------------|-----|-----|----|----------|
| CUL7     | 6:43019122_C>T   | 12  | 36  | NS | 8.26E-06 |
| LRRN1    | 3:3887010_G>A    | 21  | 42  | NS | 8.27E-06 |
| CDC42BPG | 11:64606626_T>G  | 23  | 63  | NS | 8.27E-06 |
| CDH3     | 16:68716386_G>A  | 20  | 40  | NS | 8.27E-06 |
| C3ORF67  | 3:58899563_C>T   | 32  | 63  | NS | 8.27E-06 |
| CTU2     | 16:88776631_G>C  | 135 | 279 | NS | 8.28E-06 |
| ADAM29   | 4:175897197_G>A  | 20  | 51  | NS | 8.29E-06 |
| GRHPR    | 9:37428554_G>A   | 17  | 31  | NS | 8.31E-06 |
| BSN      | 3:49698340_G>A   | 22  | 40  | NS | 8.34E-06 |
| MLKL     | 16:74719433_G>T  | 63  | 141 | NS | 8.35E-06 |
| ZNF513   | 2:27601855_C>T   | 32  | 71  | NS | 8.84E-06 |
| SCYL1    | 11:65303419_C>T  | 28  | 72  | SP | 8.98E-06 |
| C4ORF21  | 4:113482122_C>G  | 149 | 320 | NS | 1.02E-05 |
| AGRN     | 1:983186_G>A     | 36  | 77  | NS | 1.31E-05 |
| GRIK3    | 1:37285433_C>T   | 32  | 58  | NS | 1.61E-05 |
| EYA1     | 8:72184042_C>T   | 98  | 158 | NS | 1.65E-05 |
| IFT122   | 3:129231240_C>T  | 52  | 102 | NS | 1.65E-05 |
| MUC4     | 3:195487823_C>T  | 106 | 187 | NS | 1.65E-05 |
| FIBP     | 11:65653878_G>A  | 22  | 46  | NS | 1.65E-05 |
| GTF2E2   | 8:30510979_C>G   | 71  | 153 | NS | 1.65E-05 |
| FAM13C   | 10:61022330_G>T  | 67  | 148 | NS | 1.65E-05 |
| PRSS37   | 7:141536197_AC>A | 62  | 138 | FS | 1.65E-05 |
| RTCB     | 22:32788315_C>T  | 41  | 92  | NS | 1.65E-05 |
| ABCA12   | 2:215819927_G>A  | 75  | 157 | NS | 1.65E-05 |
| GIPC3    | 19:3589438_C>T   | 22  | 38  | SP | 1.66E-05 |
| ZNF407   | 18:72343804_C>T  | 86  | 165 | NS | 1.66E-05 |
| ADAM29   | 4:175898929_T>A  | 20  | 64  | NS | 1.66E-05 |
| ABI3BP   | 3:100585752_A>G  | 69  | 147 | NS | 1.66E-05 |
| NUP98    | 11:3765754_G>A   | 40  | 99  | NS | 1.67E-05 |
| OR10H4   | 19:16060734_A>G  | 25  | 55  | NS | 1.68E-05 |
| ZDHHC24  | 11:66311391_C>T  | 35  | 86  | NS | 1.69E-05 |
| PRDM1    | 6:106553812_G>C  | 21  | 40  | SP | 1.74E-05 |
| MAMDC4   | 9:139751207_G>A  | 31  | 56  | NS | 1.75E-05 |

| <b>Patient 3: homozygous</b> |                  |    |    |      |                  |
|------------------------------|------------------|----|----|------|------------------|
| Gene                         | Coordinates      | vR | tR | Type | Frequency (EXaC) |
| AHNAK2                       | 14:105416757_G>C | 5  | 6  | NS   | 0.0012           |
| DMD                          | X:32398793_G>A   | 16 | 16 | NS   |                  |
| DNMT1                        | 19:10260337_G>A  | 9  | 11 | SP   | 0.0077           |
| GNL1                         | 6:30520367_C>T   | 63 | 63 | NS   | 0.0074           |
| GPR119                       | X:129519219_C>T  | 45 | 45 | NS   | 3.42E-05         |
| IGFN1                        | 1:201181672_C>T  | 6  | 7  | NS   | 0.0002           |
| MAGEC1                       | X:140994018_C>G  | 16 | 17 | NS   | 7.94E-05         |
| MUC4                         | 3:195506369_C>A  | 44 | 49 | NS   | 6.06E-05         |
| MUC4                         | 3:195506630_T>C  | 69 | 73 | NS   | 5.91E-05         |
| PITRM1                       | 10:3182940_C>T   | 26 | 26 | NS   | 0.0001           |
| POTEI                        | 2:131221663_G>A  | 13 | 13 | NS   | 0.0003           |
| PRRT1                        | 6:32118278_T>G   | 10 | 12 | NS   | 0.0011           |
| RIMBP3                       | 22:20456768_C>T  | 6  | 7  | NS   |                  |
| SHROOM2                      | X:9863139_G>T    | 32 | 32 | NS   |                  |
| SPANXC                       | X:140335820_T>G  | 22 | 23 | NS   | 0.0072           |
| STK19                        | 6:31948509_C>T   | 10 | 10 | NS   | 0.0005           |

| <b>Patient 3 : Heterozygous</b> |                     |    |     |    |          |
|---------------------------------|---------------------|----|-----|----|----------|
| CEP170B                         | 14:105350603_G>A    | 18 | 42  | NS | 0        |
| CLPX                            | 15:65477449_G>A     | 44 | 97  | NS | 0        |
| GSE1                            | 16:85691198_A>G     | 15 | 36  | NS | 0        |
| MSN                             | X:64956727_AAGG>A   | 10 | 81  | NS | 0        |
| PCSK4                           | 19:1481916_G>A      | 12 | 32  | NS | 0        |
| THBD                            | 20:23029435_G>C     | 8  | 12  | NS | 0        |
| WT1                             | 11:32456484_AGCC>A  | 3  | 23  | NS | 0        |
| CSMD2                           | 1:34049296_T>C      | 41 | 78  | NS | 8.24E-06 |
| C2CD3                           | 11:73843946_G>C     | 67 | 124 | NS | 8.24E-06 |
| MKL2                            | 16:14354915_G>A     | 49 | 87  | NS | 8.24E-06 |
| PPP2R1B                         | 11:111624231_ATAG>A | 20 | 46  | NS | 8.25E-06 |
| LAMP3                           | 3:182872138_G>A     | 76 | 149 | NS | 8.25E-06 |
| PLCXD2                          | 3:111394102_G>T     | 12 | 36  | NS | 8.26E-06 |
| CUL7                            | 6:43019122_C>T      | 16 | 31  | NS | 8.26E-06 |

|          |                    |     |     |     |          |
|----------|--------------------|-----|-----|-----|----------|
| CDC42BPG | 11:64606626_T>G    | 29  | 50  | NS  | 8.27E-06 |
| CDH3     | 16:68716386_G>A    | 13  | 28  | NS  | 8.27E-06 |
| C3ORF67  | 3:58899563_C>T     | 32  | 71  | NS  | 8.27E-06 |
| USP54    | 10:75277060_T>C    | 31  | 76  | NS  | 8.27E-06 |
| CTU2     | 16:88776631_G>C    | 101 | 175 | NS  | 8.28E-06 |
| MTHFD2   | 2:74434861_C>A     | 48  | 96  | NS  | 8.29E-06 |
| ADAM29   | 4:175897197_G>A    | 14  | 41  | NS  | 8.29E-06 |
| CDHR2    | 5:176005574_CAGG>C | 2   | 17  | NFS | 8.30E-06 |
| GRHPR    | 9:37428554_G>A     | 10  | 24  | NS  | 8.31E-06 |
| COG4     | 16:70557397_A>G    | 33  | 59  | NS  | 8.32E-06 |
| BSN      | 3:49698340_G>A     | 27  | 47  | NS  | 8.34E-06 |
| OAS3     | 12:113403657_G>A   | 27  | 50  | NS  | 8.55E-06 |
| TMEM184B | 22:38643835_C>A    | 8   | 27  | NS  | 8.71E-06 |
| DNMT1    | 19:10270741_TG>T   | 2   | 20  | SP  | 8.76E-06 |
| ZNF786   | 7:148768980_G>C    | 19  | 31  | NS  | 9.08E-06 |
| CBWD1    | 9:178947_G>A       | 22  | 188 | NS  | 1.16E-05 |
| AGRN     | 1:983186_G>A       | 40  | 67  | NS  | 1.31E-05 |
| EYA1     | 8:72184042_C>T     | 59  | 126 | NS  | 1.65E-05 |
| MUC4     | 3:195487823_C>T    | 59  | 122 | NS  | 1.65E-05 |
| CTNNA3   | 10:67680222_C>T    | 71  | 179 | NS  | 1.65E-05 |
| FIBP     | 11:65653878_G>A    | 22  | 41  | NS  | 1.65E-05 |
| GTF2E2   | 8:30510979_C>G     | 52  | 123 | NS  | 1.65E-05 |
| RASGRF2  | 5:80366311_A>G     | 15  | 27  | NS  | 1.65E-05 |
| CPS1     | 2:211512716_A>G    | 91  | 157 | NS  | 1.65E-05 |
| KIF14    | 1:200572990_G>T    | 40  | 91  | NS  | 1.65E-05 |
| PUS7L    | 12:44148765_G>C    | 99  | 188 | NS  | 1.65E-05 |
| ABCA12   | 2:215819927_G>A    | 47  | 120 | NS  | 1.65E-05 |
| ANKMY1   | 2:241420464_C>T    | 16  | 25  | NS  | 1.65E-05 |
| MAP1LC3A | 20:33137836_C>G    | 12  | 27  | SP  | 1.65E-05 |
| GIPC3    | 19:3589438_C>T     | 15  | 27  | SP  | 1.66E-05 |
| XIRP1    | 3:39228954_GTGTC>G | 2   | 33  | FS  | 1.66E-05 |
| NAV2     | 11:20067171_A>G    | 11  | 30  | NS  | 1.66E-05 |
| ADAM29   | 4:175898929_T>A    | 11  | 44  | NS  | 1.66E-05 |
| IRAK4    | 12:44167807_G>A    | 20  | 33  | NS  | 1.67E-05 |
| EME2     | 16:1824297_TTGC>T  | 3   | 44  | NFS | 1.67E-05 |
| OR10H4   | 19:16060734_A>G    | 20  | 50  | NS  | 1.68E-05 |

vR, variant reads; tR, total reads; NS, nonsynonymous; SP, splice; FS, frameshift; NFS, non-frameshift



# Supplemental Figure 1

A

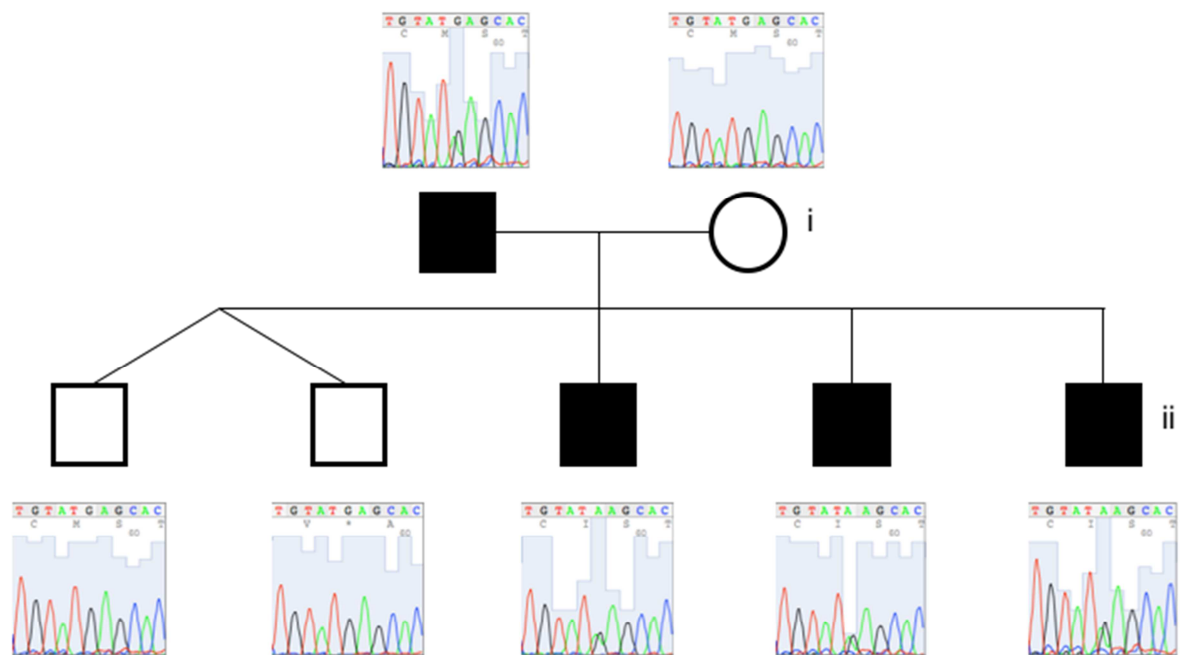

B

| Family Relationship          | # Mapped Reads | Variant Read Breakdown (%) |      |      |       |
|------------------------------|----------------|----------------------------|------|------|-------|
|                              |                | G (ref)                    | A    | T    | C     |
| Father                       | 289,095        | 51%                        | 49%  | 1%   | 0.1%  |
| Proband (Patient 1)          | 319,229        | 51%                        | 49%  | 1%   | 0.1%  |
| Affected Sibling (Patient 2) | 238,666        | 51%                        | 49%  | 1%   | 0.04% |
| Affected Sibling (Patient 3) | 282,084        | 50%                        | 49%  | 1%   | 0.1%  |
| Unaffected Sibling           | 308,459        | 99%                        | 0.4% | 0.4% | 0.01% |
| Unaffected Sibling           | 330,711        | 99%                        | 0.4% | 0.4% | 0.01% |

C

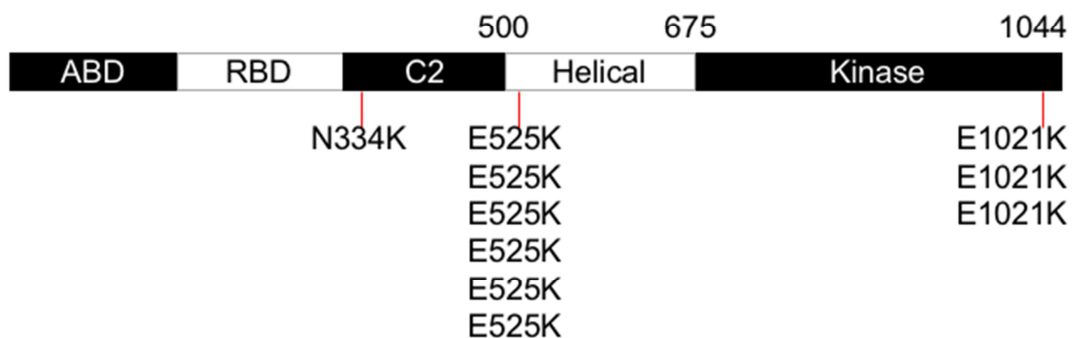

## Supplemental Figure 2

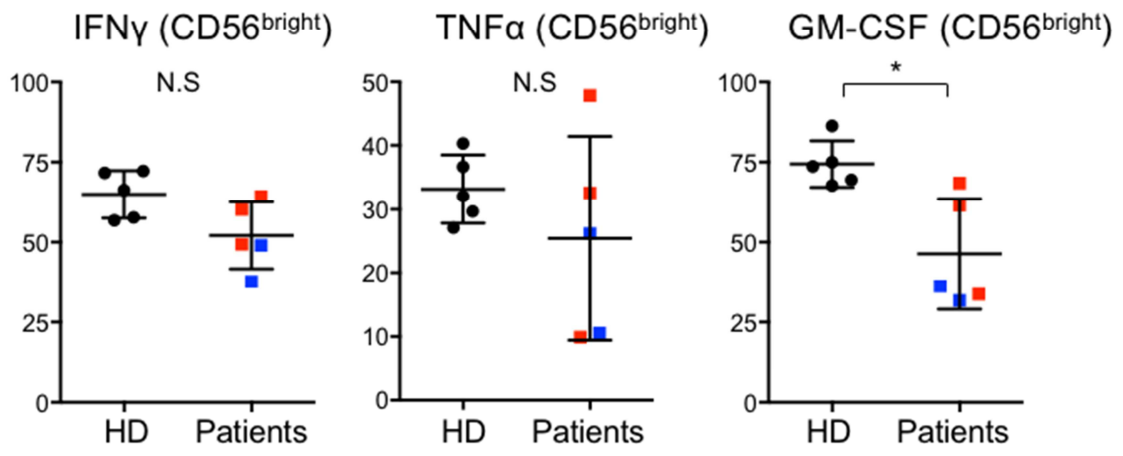

Supplement: NIHMS942016-supplement-supplement_1.pdf [file NIHMS942016-supplement-supplement_1.pdf]
